# Supplementary material
Source: PubMed Central journal article supplement (PMC3887808)

**Supplementary Fig. 1** Dieckol affects migration and invasion of B16 mouse melanoma cells at the concentration of 25  $\mu\text{g/ml}$ . (A-D) B16F0 and B16F10 cells were treated with various concentrations (0-100  $\mu\text{g/ml}$ ) of dieckol for 24 h under serum-starved condition and then assessed for cell viability, migration, and invasion. \*,  $P < 0.05$  compared with control (-). †,  $P < 0.05$  compared with  $\text{H}_2\text{O}_2$  (+ $\text{H}_2\text{O}_2$ ).

**A B16F0 cells**

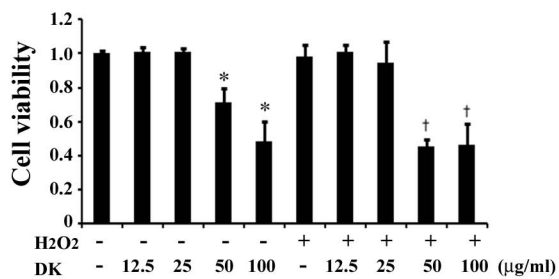

**B B16F10 cells**

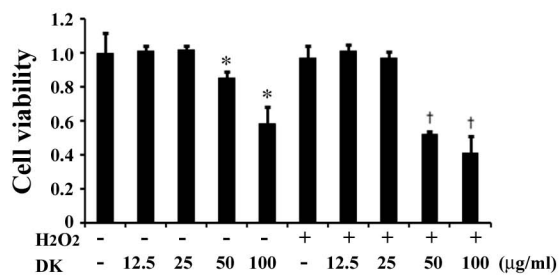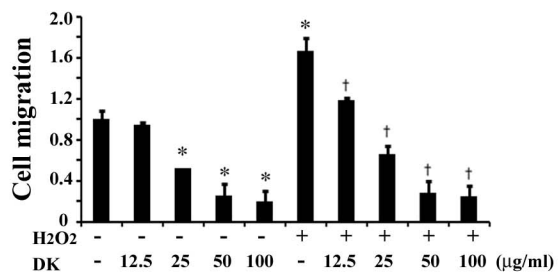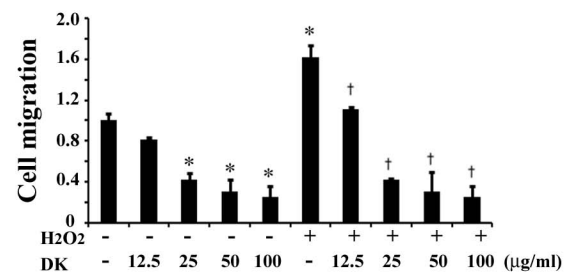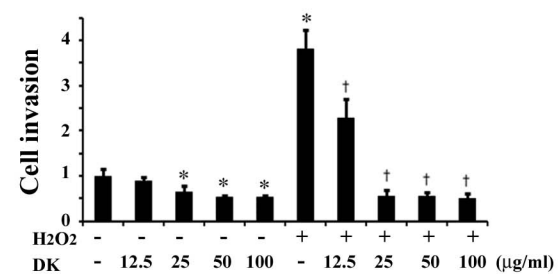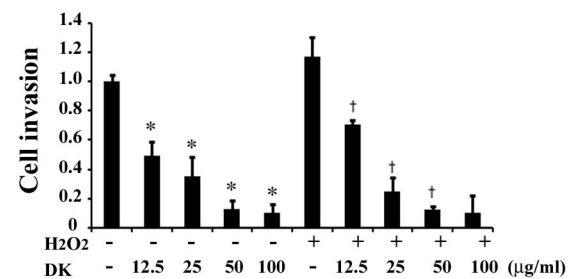

Supplement: molcell-33-4-363-6-supplementary.pdf [file molcell-33-4-363-6-supplementary.pdf]
